# Supplementary material
Source: PubMed Central journal article supplement (PMC1891216)
Supplement: pnas_0610799104_6.pdf [file pnas_0610799104_6.pdf]

**Table 5. Screen for RILs with weak long-range LI**

| <b>line</b> | <b>P5.p</b> | <b>1°</b> | <b>total</b> | <b>line</b> | <b>P5.p</b> | <b>1°</b> | <b>total</b> |
|-------------|-------------|-----------|--------------|-------------|-------------|-----------|--------------|
| A8          |             | 16        | 18           | C28         |             | 0         | 3            |
| C64         |             | 8         | 16           | A15         |             | 2         | 2            |
| C22         |             | 12        | 13           | A21         |             | 2         | 2            |
| C27         |             | 9         | 12           | A1          |             | 1         | 2            |
| A33         |             | 6         | 10           | A4          |             | 1         | 2            |
| B4          |             | 2         | 9            | A13         |             | 1         | 2            |
| C8          |             | 0         | 9            | A22         |             | 1         | 2            |
| A10         |             | 5         | 8            | A34         |             | 1         | 2            |
| C23         |             | 5         | 6            | A36         |             | 1         | 2            |
| A16         |             | 3         | 6            | C7          |             | 1         | 2            |
| C13         |             | 3         | 6            | C24         |             | 1         | 2            |
| C25         |             | 2         | 6            | A2          |             | 0         | 2            |
| A7          |             | 3         | 5            | B6          |             | 0         | 2            |
| A9          |             | 0         | 5            | B13         |             | 0         | 2            |
| C30         |             | 0         | 5            | B17         |             | 0         | 2            |
| A37         |             | 4         | 4            | B24         |             | 0         | 2            |
| A38         |             | 2         | 4            | C4          |             | 0         | 2            |
| A35         |             | 0         | 4            | C17         |             | 0         | 2            |
| A5          |             | 2         | 3            | C18         |             | 0         | 2            |
| B14         |             | 2         | 3            | C19         |             | 0         | 2            |
| C42         |             | 2         | 3            | C32         |             | 0         | 2            |
| A3          |             | 1         | 3            | A11         |             | 0         | 1            |
| A23         |             | 1         | 3            | A14         |             | 0         | 1            |
| A47         |             | 1         | 3            | A39         |             | 0         | 1            |
| B12         |             | 1         | 3            | C9          |             | 0         | 1            |
| C2          |             | 1         | 3            | C11         |             | 0         | 1            |
| C55         |             | 1         | 3            | C20         |             | 0         | 1            |
| C14         |             | 0         | 3            | C29         |             | 0         | 1            |
| C26         |             | 0         | 3            | C33         |             | 0         | 1            |

P(6,7).p was ablated in a small number of animals, and numbers were increased in candidates that showed exclusively 1° P5.ps among the first few animals.
