# Supplementary material
Source: PubMed Central journal article supplement (PMC1891216)
Supplement: pnas_0610799104_7.pdf [file pnas_0610799104_7.pdf]

**Table 6. Screen for second RILs with weak long-range LI**

| <b>line</b> | <b>P5.1°</b> | <b>total</b> |
|-------------|--------------|--------------|
| A8BC18      | 11           | 12           |
| A8BC7       | 19           | 23           |
| A8BC10      | 15           | 17           |
| A8BC8       | 5            | 8            |
| A8BC16      | 3            | 4            |
| A8BC6       | 1            | 4            |
| A8BC19      | 1            | 4            |
| A8BC4       | 1            | 4            |
| A8BC13      | 0            | 4            |
| A8BC5       | 2            | 3            |
| A8BC1       | 0            | 3            |
| A8BC11      | 1            | 2            |
| A8BC2       | 0            | 2            |
| A8BC3       | 0            | 2            |
| A8BC22      | 0            | 2            |
| A8BC21      | 1            | 1            |
| A8BC22      | 1            | 1            |
| A8BC9       | 0            | 1            |
| A8BC12      | 0            | 1            |
| A8BC17      | 0            | 1            |

P(6,7).p was ablated in a small number of animals and numbers were increased in candidates that showed exclusively 1° P5.ps among the first few animals.
