# Supplementary material
Source: PubMed Central journal article supplement (PMC1891216)
Supplement: pnas_0610799104_8.pdf [file pnas_0610799104_8.pdf]

**Table 7. Screen for third RILs with P8.p competence**

| <b>line</b> | <b>P8.p diff.</b> | <b>total</b> | <b>line</b> | <b>P8.p diff.</b> | <b>total</b> |
|-------------|-------------------|--------------|-------------|-------------------|--------------|
| A8BC7BC30   | 9                 | 14           | A8BC7BC11   | 0                 | 2            |
| A8BC7BC59   | 7                 | 16           | A8BC7BC17   | 0                 | 2            |
| A8BC7BC77   | 4                 | 8            | A8BC7BC22   | 0                 | 2            |
| A8BC7BC10   | 3                 | 17           | A8BC7BC24   | 0                 | 2            |
| A8BC7BC56   | 2                 | 13           | A8BC7BC25   | 0                 | 2            |
| A8BC7BC47   | 1                 | 8            | A8BC7BC26   | 0                 | 2            |
| A8BC7BC20   | 1                 | 2            | A8BC7BC27   | 0                 | 2            |
| A8BC7BC21   | 0                 | 6            | A8BC7BC32   | 0                 | 2            |
| A8BC7BC40   | 0                 | 5            | A8BC7BC35   | 0                 | 2            |
| A8BC7BC79   | 0                 | 4            | A8BC7BC36   | 0                 | 2            |
| A8BC7BC1    | 0                 | 3            | A8BC7BC50   | 0                 | 2            |
| A8BC7BC12   | 0                 | 3            | A8BC7BC53   | 0                 | 2            |
| A8BC7BC19   | 0                 | 3            | A8BC7BC54   | 0                 | 2            |
| A8BC7BC28   | 0                 | 3            | A8BC7BC72   | 0                 | 2            |
| A8BC7BC34   | 0                 | 3            | A8BC7BC76   | 0                 | 2            |
| A8BC7BC38   | 0                 | 3            | A8BC7BC78   | 0                 | 2            |
| A8BC7BC49   | 0                 | 3            | A8BC7BC80   | 0                 | 2            |
| A8BC7BC57   | 0                 | 3            | A8BC7BC3    | 0                 | 1            |
| A8BC7BC61   | 0                 | 3            | A8BC7BC4    | 0                 | 1            |
| A8BC7BC62   | 0                 | 3            | A8BC7BC29   | 0                 | 1            |
| A8BC7BC63   | 0                 | 3            | A8BC7BC55   | 0                 | 1            |
| A8BC7BC64   | 0                 | 3            | A8BC7BC58   | 0                 | 1            |
| A8BC7BC71   | 0                 | 3            | A8BC7BC65   | 0                 | 1            |
| A8BC7BC6    | 0                 | 2            | A8BC7BC74   | 0                 | 1            |
| A8BC7BC8    | 0                 | 2            |             |                   |              |

P(5-7).p was ablated and animals were checked in early J4 stage for differentiation of P8.p. Numbers were increased if lines showed P8.p competence within the first tested animals.
