# Supplementary material
Source: PubMed Central journal article supplement (PMC1891216)
Supplement: pnas_0610799104_9.pdf [file pnas_0610799104_9.pdf]

**Table 8. Long-range LI in RIL A8-7-70 and short-range LI in RIL A8-BC7**

|                      | <b>P5.p</b> | <b>P6.p</b> | <b>P7.p</b> | <b>P8.p</b> | <b>n</b> |
|----------------------|-------------|-------------|-------------|-------------|----------|
| <b>A</b> RIL A8-7-30 | 1°          | X           | X           | 3°          | 2/6      |
|                      | 2°          | X           | X           | 3°          | 4/6      |
| <b>B</b> RIL A8 BC7  | X           | X           | 1°          | 3°          | 4/10     |
|                      | X           | X           | 1°          | 2°          | 1/10     |
|                      | X           | X           | 2°          | 3°          | 5/10     |

VPC lineages after ablation of P(6,7).p (**A**) and P(5,6).p (**B**). For definitions of cell fates, see ref. 1. **X**: ablated cell. In RIL A8-7-30, P8.p is competent (see Table 3, M); however, P5.p had a 1° fate in only two of six cases, indicating that long-range LI is still effective in this strain. In RIL A8 BC7 P8.p is competent (Table 3, J) and long-range LI is virtually lost (Table 2, W). However, P7.p had the 1° fate in 5 of 10 cases, which indicates that the competence of P5.p and P7.p may be regulated independently.

1. Jungblut B, Sommer RJ (2000) *Development (Cambridge, UK)* 127:3295-3303.
