# Supplementary material
Source: PubMed Central journal article supplement (PMC1891216)

PS1843

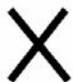

RS106

F1

F2  
F3  
⋮  
⋮  
>F8

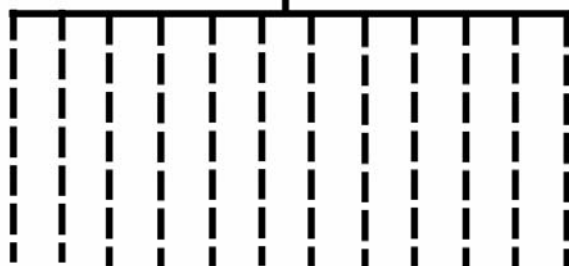

RILs

VPC ablations

SSCP genotyping

selected RILs X RS106

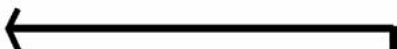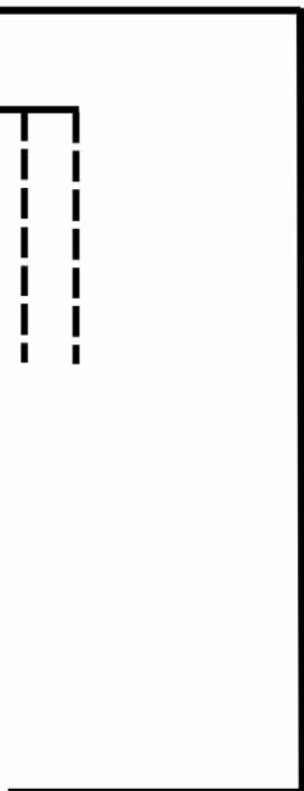

Supplement: pnas_0610799104_2.pdf [file pnas_0610799104_2.pdf]

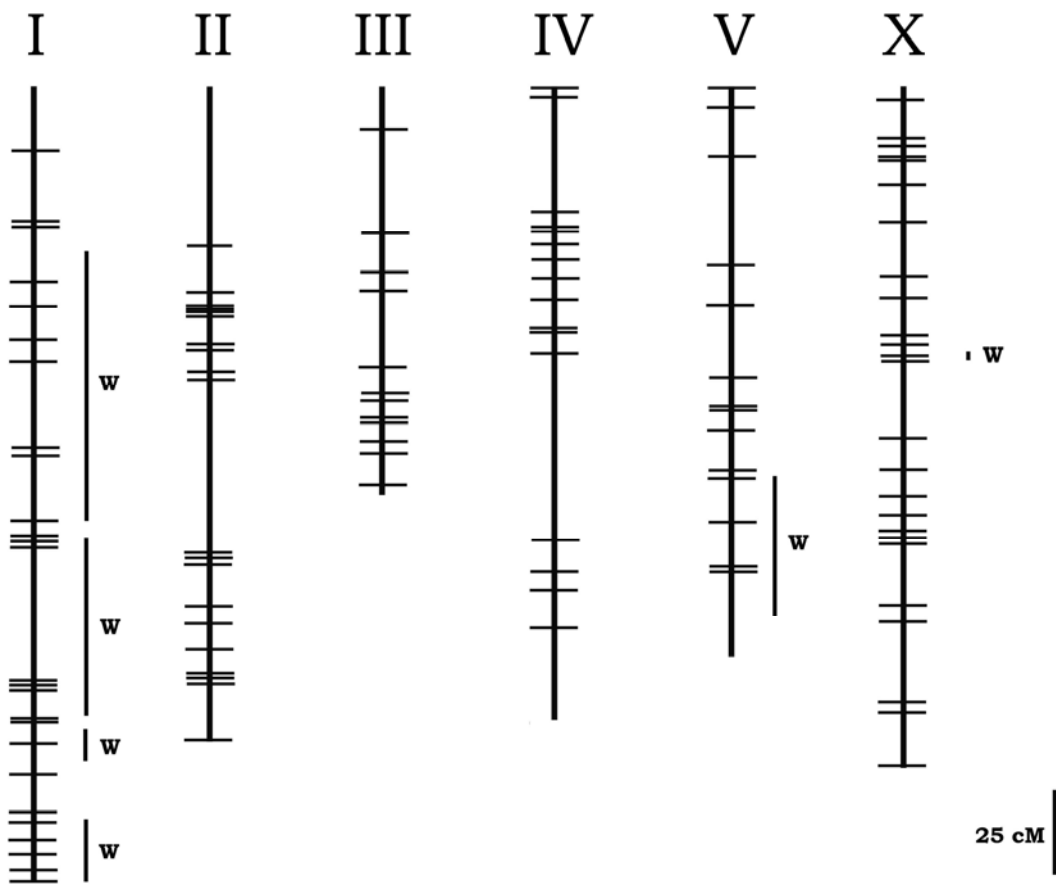

Supplement: pnas_0610799104_3.pdf [file pnas_0610799104_3.pdf]
